# Supplementary material for: Bacterial microbiota similarity between predators and prey in a blue tit trophic network
Source: PubMed Central journal article supplement (PMC8115664; doi:10.1038/s41396-020-00836-3), 2021-02-12
Supplement: 41396_2020_836_MOESM1_ESM.pdf [file 41396_2020_836_MOESM1_ESM.pdf]

## **Supplementary Information Description**

The Supplementary Information is a PDF file containing rarefaction curves for microbiota samples (Figure 1), sample sizes for every analysis in the manuscript (Table 1), taxonomic composition of controls (Figure 2) and of samples (Table 2 and Figure 3), and the proportion of ASVs shared between host types (Figure 4).
